# Supplementary material for: In situ template generation via N-alkylation in the syntheses of open-framework zinc phosphites and phosphate
Source: Royal Society of Chemistry journal article supplement (doi:10.1039/c3dt51434j), 2013-01-01
Supplement: c3dt51434j.pdf [file c3dt51434j.pdf]

## Support information

### In Situ template Generation via *N*-alkylation in the Syntheses of Open-framework Zinc

#### Phosphites and Phosphate

Guo-Ming Wang,<sup>a,\*</sup> Jin-Hua Li,<sup>a</sup> Xiao Zhang,<sup>a</sup> Pei Wang,<sup>a</sup> Bei-Bei Pang,<sup>a</sup> Zong-Hua Wang,<sup>a</sup> Ying-Xia Wang,<sup>b,\*</sup> Jian-Hua Lin<sup>b</sup> and Chun-Yang Pan<sup>c</sup>

*<sup>a</sup>Teachers College, College of Chemistry, Chemical Engineering and Environment of Qingdao University, Shandong 266071, China; <sup>b</sup>Beijing National Laboratory for Molecular Sciences, College of Chemistry and Molecular Engineering, Peking University, Beijing 100871, China; <sup>c</sup>School of Chemical Engineering and Light Industry, Guangdong University of Technology, Guangzhou 510006, China*

\*Corresponding authors. Fax: +86-532-85956024

E-mail address: [gmwang\\_pub@163.com](mailto:gmwang_pub@163.com); [wangyx@pku.edu.cn](mailto:wangyx@pku.edu.cn).

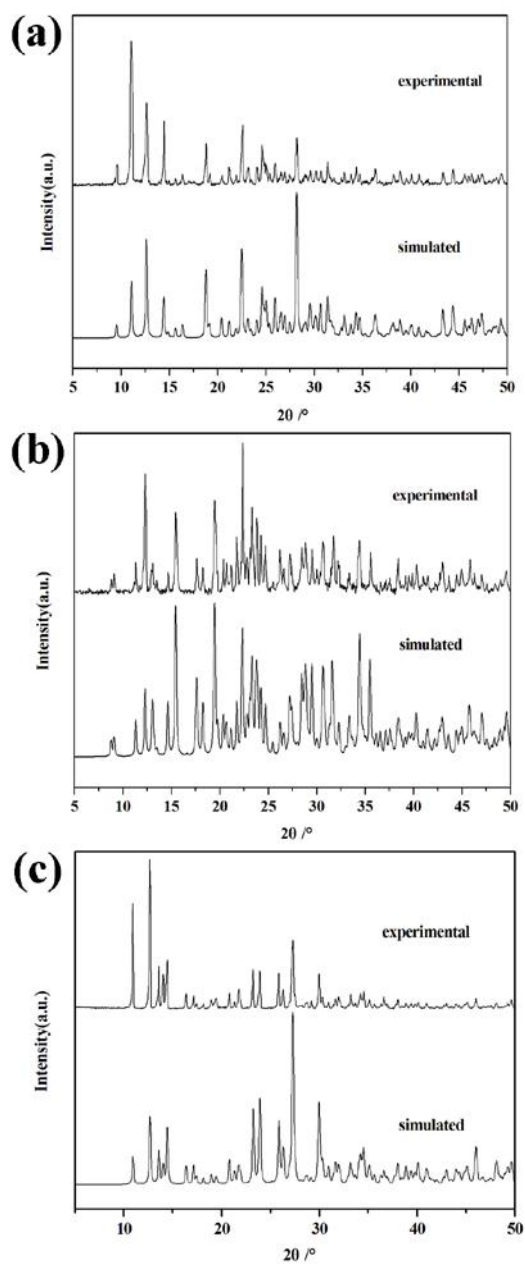

**Figure S1.** Simulated and experimental X-ray powder diffraction patterns of compounds I (a), II (b) and III (c).

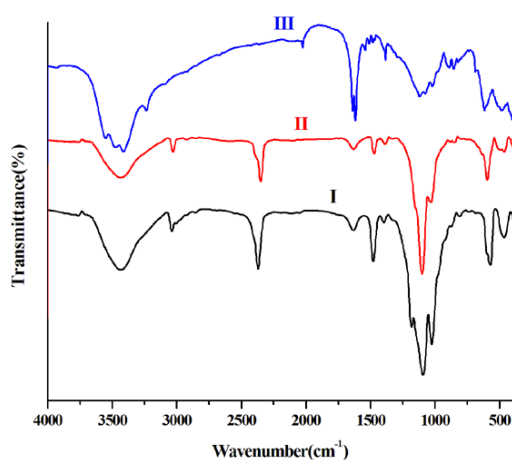

**Figure S2.** IR spectra of compounds I-III.

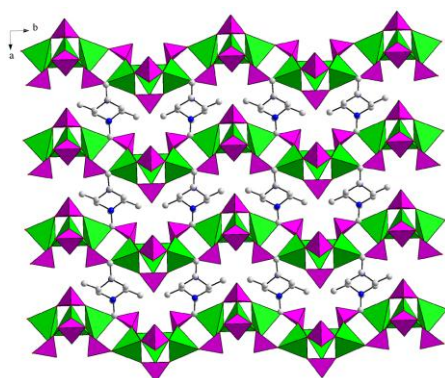

**Figure S3.** View of the structure of I along the [001] direction, showing the inorganic layers intercalated with organic pmpip<sup>2+</sup> cations. Color code: ZnO<sub>4</sub> tetrahedra, green; HPO<sub>3</sub> pseudopyramids, purple.

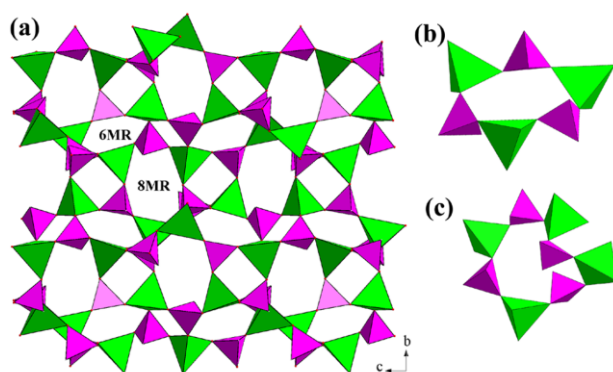

**Figure S4.** View of the structure of compound II along the [100] direction, showing the 6- and 8-ring channels. Color code: ZnO<sub>4</sub> tetrahedra, green; HPO<sub>3</sub> pseudopyramids, purple.

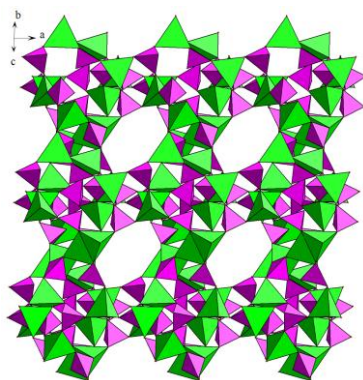

**Figure S5.** View of the structure of **II** along the [011] direction, showing the puckered 12-ring channels. Color code: ZnO<sub>4</sub> tetrahedra, green; HPO<sub>3</sub> pseudopyramids, purple.

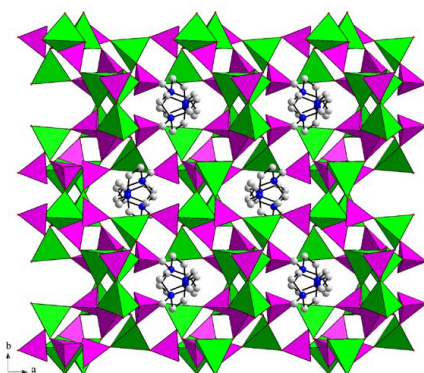

**Figure S6.** View of the structure of **II** along the [001] direction with dmdabco<sup>2+</sup> cations residing in the 10-ring channels. Color code: ZnO<sub>4</sub> tetrahedra, green; HPO<sub>3</sub> pseudopyramids, purple.

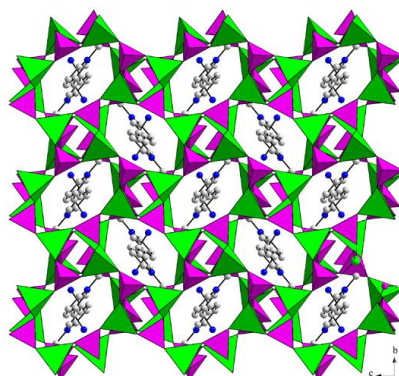

**Figure S7.** View of the structure of **III** along the [100] direction with mampy<sup>2+</sup> cations residing in the 8-ring channels. Color code: ZnO<sub>4</sub> tetrahedra, green; HPO<sub>3</sub> pseudopyramids, purple.
